# Supplementary material for: Trends in Atrial Fibrillation-Related Mortality Among Older Adults With hypertension in the United States, 2001–2023
Source: Research Square preprint supplement (doi:10.21203/rs.3.rs-7422150/v1), 2025-09-30
Supplement: Supplementary file 1 [file 6a3bfd9453985c0bfa3c60c2.docx]

**Supplementary Table 1.** AF and Hypertension-related mortality among older adults stratified by sex and race in the United States from 2001 to 2023.

| **Year** | **AAMR (95%CI)** | | | | | |
| --- | --- | --- | --- | --- | --- | --- |
| **Overall** | **Female** | **Male** | **Hispanic** | **NH Black** | **NH White** |
| 2001 | 2.77 (2.59, 2.94) | 3.04 (2.81, 3.26) | 2.11 (1.85, 2.37) | 1.69 (1.09, 2.5) | 2.3 (1.76, 2.95) | 2.82 (2.63, 3.01) |
| 2002 | 3.24 (3.05, 3.43) | 3.58 (3.34, 3.82) | 2.45 (2.17, 2.72) | 1.76 (1.16, 2.56) | 2.77 (2.18, 3.47) | 3.35 (3.14, 3.55) |
| 2003 | 3.35 (3.16, 3.53) | 3.68 (3.44, 3.93) | 2.63 (2.35, 2.91) | 1.71 (1.12, 2.48) | 2.9 (2.29, 3.62) | 3.55 (3.34, 3.76) |
| 2004 | 3.32 (3.14, 3.51) | 3.63 (3.38, 3.87) | 2.75 (2.47, 3.04) | 1.64 (1.09, 2.37) | 3.35 (2.69, 4.11) | 3.38 (3.18, 3.58) |
| 2005 | 3.77 (3.57, 3.96) | 4.14 (3.88, 4.39) | 3.02 (2.73, 3.31) | 2.04 (1.43, 2.83) | 2.8 (2.22, 3.49) | 4.01 (3.79, 4.23) |
| 2006 | 3.86 (3.66, 4.06) | 4.33 (4.06, 4.59) | 3 (2.71, 3.29) | 2.09 (1.49, 2.85) | 2.51 (1.96, 3.16) | 4.1 (3.88, 4.32) |
| 2007 | 5.48 (5.25, 5.71) | 6.13 (5.82, 6.44) | 4.37 (4.02, 4.71) | 2.83 (2.14, 3.67) | 4.09 (3.35, 4.83) | 5.85 (5.59, 6.11) |
| 2008 | 5.8 (5.56, 6.03) | 6.25 (5.94, 6.55) | 4.88 (4.52, 5.24) | 2.86 (2.18, 3.68) | 4.72 (3.94, 5.5) | 6.14 (5.88, 6.41) |
| 2009 | 5.72 (5.49, 5.96) | 6.37 (6.06, 6.68) | 4.49 (4.15, 4.83) | 3.28 (2.58, 4.12) | 4.23 (3.51, 4.96) | 6.12 (5.86, 6.39) |
| 2010 | 6.45 (6.2, 6.69) | 7.03 (6.71, 7.35) | 5.3 (4.94, 5.67) | 3.48 (2.77, 4.33) | 5.32 (4.51, 6.13) | 6.85 (6.57, 7.13) |
| 2011 | 6.8 (6.55, 7.05) | 7.28 (6.95, 7.6) | 5.69 (5.32, 6.07) | 3.65 (2.95, 4.47) | 4.68 (3.94, 5.43) | 7.25 (6.97, 7.53) |
| 2012 | 7.49 (7.24, 7.75) | 8.02 (7.68, 8.35) | 6.43 (6.04, 6.82) | 4.26 (3.48, 5.04) | 5.97 (5.14, 6.79) | 8 (7.71, 8.3) |
| 2013 | 7.69 (7.43, 7.95) | 8.18 (7.85, 8.52) | 6.77 (6.38, 7.16) | 4.12 (3.38, 4.86) | 5.3 (4.54, 6.06) | 8.34 (8.05, 8.64) |
| 2014 | 7.99 (7.73, 8.25) | 8.51 (8.17, 8.85) | 6.89 (6.5, 7.28) | 4.14 (3.43, 4.86) | 5.4 (4.65, 6.15) | 8.77 (8.46, 9.07) |
| 2015 | 8.59 (8.33, 8.86) | 9.27 (8.92, 9.63) | 7.37 (6.97, 7.77) | 5.06 (4.3, 5.83) | 5.93 (5.16, 6.71) | 9.34 (9.03, 9.65) |
| 2016 | 9.03 (8.76, 9.3) | 9.4 (9.05, 9.75) | 8.22 (7.8, 8.63) | 5.87 (5.07, 6.67) | 6.13 (5.36, 6.91) | 9.82 (9.51, 10.13) |
| 2017 | 9.47 (9.2, 9.74) | 9.91 (9.55, 10.27) | 8.67 (8.25, 9.08) | 5.33 (4.59, 6.08) | 6.75 (5.96, 7.55) | 10.42 (10.1, 10.74) |
| 2018 | 9.28 (9.01, 9.54) | 9.55 (9.21, 9.9) | 8.66 (8.25, 9.07) | 5.83 (5.08, 6.59) | 6.69 (5.91, 7.48) | 10.13 (9.82, 10.45) |
| 2019 | 9.59 (9.32, 9.85) | 9.85 (9.5, 10.19) | 9.04 (8.62, 9.45) | 5.27 (4.57, 5.97) | 6.63 (5.86, 7.4) | 10.62 (10.31, 10.94) |
| 2020 | 10.11 (9.84, 10.38) | 10.31 (9.95, 10.66) | 9.58 (9.16, 10) | 5.36 (4.67, 6.06) | 7.35 (6.55, 8.14) | 11.22 (10.89, 11.54) |
| 2021 | 11.93 (11.62, 12.23) | 12.08 (11.68, 12.48) | 11.52 (11.05, 12) | 6.24 (5.48, 7) | 9.38 (8.46, 10.3) | 13.39 (13.02, 13.76) |
| 2022 | 11.88 (11.58, 12.17) | 11.77 (11.39, 12.15) | 11.79 (11.32, 12.26) | 6.65 (5.89, 7.4) | 9.28 (8.38, 10.18) | 13.21 (12.86, 13.56) |
| 2023 | 12.54 (12.24, 12.84) | 12.5 (12.11, 12.89) | 12.35 (11.88, 12.83) | 6.62 (5.86, 7.37) | 9.91 (9, 10.83) | 14.08 (13.71, 14.45) |

**Supplementary Table 2.** AF and Hypertension-related mortality among older adults stratified by urbanization in the United States from 2001 to 2020.

| **Year** | **AAMR (95%CI)** | |
| --- | --- | --- |
| **Metropolitan** | **Nonmetropolitan** |
| 2001 | 2.62 (2.43, 2.8) | 3.23 (2.8, 3.66) |
| 2002 | 3.19 (2.99, 3.4) | 3.31 (2.88, 3.75) |
| 2003 | 3.25 (3.04, 3.45) | 3.67 (3.22, 4.12) |
| 2004 | 3.27 (3.07, 3.48) | 3.68 (3.23, 4.13) |
| 2005 | 3.73 (3.51, 3.94) | 4.01 (3.54, 4.48) |
| 2006 | 3.8 (3.58, 4.01) | 4.19 (3.72, 4.67) |
| 2007 | 5.34 (5.08, 5.59) | 6.22 (5.64, 6.8) |
| 2008 | 5.64 (5.38, 5.9) | 6.55 (5.96, 7.14) |
| 2009 | 5.63 (5.37, 5.88) | 6.26 (5.69, 6.83) |
| 2010 | 6.39 (6.12, 6.65) | 6.9 (6.3, 7.49) |
| 2011 | 6.72 (6.45, 7) | 7.1 (6.5, 7.7) |
| 2012 | 7.16 (6.89, 7.44) | 8.97 (8.3, 9.64) |
| 2013 | 7.37 (7.09, 7.65) | 9.22 (8.55, 9.89) |
| 2014 | 7.69 (7.41, 7.97) | 9.43 (8.75, 10.11) |
| 2015 | 8.3 (8.01, 8.59) | 9.96 (9.27, 10.64) |
| 2016 | 8.8 (8.51, 9.09) | 10.22 (9.53, 10.92) |
| 2017 | 9.23 (8.93, 9.52) | 10.77 (10.06, 11.47) |
| 2018 | 8.92 (8.63, 9.2) | 11.08 (10.38, 11.79) |
| 2019 | 9.22 (8.93, 9.51) | 11.41 (10.7, 12.12) |
| 2020 | 9.59 (9.3, 9.88) | 12.76 (12.01, 13.51) |

**Supplementary Table 3.** AF and Hypertension-related mortality among older adults stratified by census region in the United States from 2001 to 2023.

| **Year** | **AAMR (95%CI)** | | | |
| --- | --- | --- | --- | --- |
| **Northeast** | **Midwest** | **South** | **West** |
| 2001 | 2.83 (2.46, 3.2) | 2.68 (2.34, 3.03) | 2.67 (2.38, 2.96) | 2.86 (2.46, 3.26) |
| 2002 | 2.93 (2.55, 3.32) | 3.41 (3.02, 3.8) | 3.12 (2.81, 3.44) | 3.44 (3.01, 3.87) |
| 2003 | 3.27 (2.87, 3.67) | 3.3 (2.92, 3.68) | 3.36 (3.04, 3.69) | 3.4 (2.97, 3.82) |
| 2004 | 3.08 (2.69, 3.46) | 3.61 (3.22, 4.01) | 3.16 (2.85, 3.48) | 3.58 (3.15, 4.01) |
| 2005 | 3.84 (3.41, 4.27) | 3.76 (3.36, 4.16) | 3.51 (3.18, 3.83) | 4.19 (3.73, 4.65) |
| 2006 | 3.47 (3.07, 3.87) | 4.22 (3.8, 4.64) | 3.33 (3.02, 3.65) | 4.71 (4.23, 5.19) |
| 2007 | 4.87 (4.4, 5.35) | 5.57 (5.09, 6.05) | 4.83 (4.46, 5.2) | 7.11 (6.53, 7.69) |
| 2008 | 5.4 (4.9, 5.89) | 6.04 (5.55, 6.54) | 5.32 (4.94, 5.71) | 6.7 (6.14, 7.26) |
| 2009 | 4.44 (3.99, 4.89) | 6.14 (5.65, 6.64) | 5.48 (5.09, 5.86) | 6.88 (6.32, 7.44) |
| 2010 | 5.76 (5.25, 6.26) | 6.54 (6.04, 7.05) | 6.01 (5.61, 6.41) | 7.77 (7.18, 8.36) |
| 2011 | 6.27 (5.75, 6.79) | 7.44 (6.9, 7.97) | 6.01 (5.62, 6.41) | 7.75 (7.18, 8.33) |
| 2012 | 6.19 (5.68, 6.71) | 8.39 (7.83, 8.95) | 6.98 (6.56, 7.4) | 8.54 (7.95, 9.13) |
| 2013 | 6.61 (6.08, 7.14) | 8.02 (7.48, 8.57) | 7.37 (6.95, 7.8) | 9.05 (8.45, 9.65) |
| 2014 | 6.67 (6.14, 7.2) | 8.42 (7.86, 8.98) | 7.63 (7.21, 8.06) | 9.29 (8.68, 9.89) |
| 2015 | 7.68 (7.12, 8.24) | 8.97 (8.4, 9.54) | 8.1 (7.67, 8.53) | 9.84 (9.24, 10.45) |
| 2016 | 7.49 (6.93, 8.04) | 8.89 (8.33, 9.46) | 9.12 (8.67, 9.57) | 10.39 (9.78, 11.01) |
| 2017 | 8.07 (7.51, 8.63) | 9.59 (9.01, 10.17) | 9.33 (8.88, 9.78) | 10.76 (10.14, 11.38) |
| 2018 | 7.86 (7.3, 8.41) | 10.42 (9.82, 11.02) | 8.82 (8.39, 9.25) | 10.26 (9.66, 10.86) |
| 2019 | 7.44 (6.91, 7.98) | 10.89 (10.28, 11.5) | 9.29 (8.85, 9.72) | 10.75 (10.14, 11.35) |
| 2020 | 7.91 (7.36, 8.46) | 11.34 (10.72, 11.96) | 9.91 (9.47, 10.36) | 11.16 (10.55, 11.76) |
| 2021 | 9.19 (8.58, 9.8) | 13.65 (12.94, 14.35) | 11.89 (11.39, 12.39) | 12.84 (12.17, 13.52) |
| 2022 | 8.74 (8.17, 9.32) | 12.68 (12.02, 13.33) | 12.45 (11.95, 12.94) | 12.92 (12.27, 13.57) |
| 2023 | 9.43 (8.83, 10.04) | 13.72 (13.03, 14.41) | 13.12 (12.61, 13.63) | 13.15 (12.49, 13.81) |
